# Supplementary material
Source: publisher figshare collection journal article supplement (https://tandf.figshare.com/ndownloader/files/10270473)
Supplement: Supplementary file 1 [file 10270473]

Suplementary material 5. Species and strains observed in morphological analysis.

| Group | Species | Population sample | Localities | Collector |
| --- | --- | --- | --- | --- |
| *bocainensis* | *D. capricorni* |  | Porto Alegre/Brazil | Carolina Flores Garcia |
|  | *D. fumipennis* | FJ | Joinville/ Brazil | Carolina Flores Garcia |
|  | *D. nebulosa* | JBO | Porto Alegre/Brazil | Carolina Flores Garcia |
|  |  | SM/RS | Santa Maria/ Brazil |  |
|  |  | UFPE | Pernambuco/ Brazil | Cláudia Rohde |
|  | *D. sucinea* | Stock Center | Mexico City/ Mexico | Stock Center |
| *sturtevanti* | *D. sturtevanti* |  |  |  |
| *willistoni* | *D. equinoxialis* | Mexico | Apazapán/ Mexico | Lee Ehrman/ Yong K. Kim |
|  |  | FNT12 | Belterra/ Brazil | Mário Josias Müller |
|  |  | FNT19 | Belterra/ Brazil | Mário Josias Müller |
|  |  | FNT32 | Belterra/ Brazil | Mário Josias Müller |
|  |  | Tape03 | Santarém/ Brazil | Mário Josias Müller |
|  |  | Tape31 | Santarém/ Brazil | Mário Josias Müller |
|  |  | Tape32 | Santarém/ Brazil | Mário Josias Müller |
|  |  | Tape63 | Santarém/ Brazil | Mário Josias Müller |
|  |  | Tape89 | Santarém/ Brazil | Mário Josias Müller |
|  |  | 207018 | Belém do Pará/ Brazil | Mário Josias Müller |
|  | *D. insularis* | SL03 | Saint Lucia/ Lesser Antilles | Jeffrey R. Powell |
|  |  | SL15 | Saint Lucia/ Lesser Antilles | Jeffrey R. Powell |
|  | *D. paulistorum* Amazonian | Pará Fêmea 3 | Belém do Pará/ Brazil | Lee Ehrman/ Yong K. Kim |
|  |  | Tape 60 | Santarém/ Brazil | Mário Josias Müller |
|  | *D. paulistorum* Andean-Brazilian | MLC | Florianópolis/ Brazil | Marco Gottschalk |
|  |  | RIB | Ribeirão Preto/ Brazil | Vera L. S. Valente |
|  |  | RMT | Porto Alegre/ Brazil | Ana Lauer Garcia |
|  |  | Pool-Bur | Brasília/ Brazil | Rosana Tidon |
|  |  | Jaton-Sacha | Jaton-Sacha/ Ecuador | Margaret Kidwell |
|  | *D. paulistorum* Centroamerican | Lancetilla | Lancetilla/ Honduras | Lee Ehrman/ Yong K. Kim |
|  | *D. paulistorum* Interior | INT | Llanos/ Colombia | Lee Ehrman/ Yong K. Kim |
|  | *D. paulistorum* Orinocan | ORI | Georgetown/ Guiana | Lee Ehrman/ Yong K. Kim |
|  | *D. paulistorum* Transitional | Santa Marta | Santa Marta/ Colombia | Lee Ehrman/ Yong K. Kim |
|  | *D. tropicalis* | 0801 | San Salvador/ El Salvador | Tucson Stock Center |
|  | *D. willistoni* | WIP4 | Salvador/ Brazil | Antonio Cordeiro/ Helga Winge |
|  |  | Gdh4-1 | Guadeloupe/ Caribbe | Tucson Stock Center |
|  |  | Ribeirão Preto | Ribeirão Preto/ Brazil | Claúdia Rohde |
|  |  | México | Apazapán/ Mexico | Margaret Kidwell |
|  |  | DW-Pool Ita | Itapuã/ Brazil | André Schnorr |
|  |  | DW Pool-Faz | Serra do Cipó/ Brazil | Carlos Vilela |
|  |  | CIP | Serra do Cipó/ Brazil | Carlos Vilela |
|  |  | COR | Coronilla/ Uruguay | Beatriz Goñi |
|  |  | ISC | Santa Catarina/ Brazil | Daniela De Toni |
|  |  | DLA | Dois Lajeados/ Brazil | Cláudia Rohde |
|  |  | MAS | Morro Santanna/ Brazil | Ana Lauer Garcia |
|  |  | Joinville | Joinville/ Brazil | Jonas Döge |
|  |  | 17A2 | Eldorado do Sul/ Brazil | Vera L. S. Valente |
